# Supplementary material for: A novel mouse model for studying complications related to type 2 diabetes using a medium-fat diet, fructose, and streptozotocin
Source: Sci Rep. 2025 Jul 1;15:20861. doi: 10.1038/s41598-025-04335-3 (PMC12217141; doi:10.1038/s41598-025-04335-3)
Supplement: Supplementary file 1 — Supplementary Material 1 [file 41598_2025_4335_MOESM1_ESM.xlsx]

## Sheet: Figure 1
Body Weight S20				Fasting Glucose Level S20				Plasma Insuline S20				HOMA IR S20
N	D	D+T		N	D	D+T		N	D	D+T		N	D	D+T
35.92	44.71	49.38		126	155	160		0.077389	0.087141	0.161705		0.863037	0.826887	2.00959
30.52	36.24	40.32		175	160	175		0.129861	0.10976	0.136979		1.07323	1.07512	1.60169
29.89	43.6	46.49		121	156	227		0.089607	0.037452	0.127603		2.34308	0.357672	3.20285
33.24	43.1	43.14		171	141	282		0.035361	0.076732	0.205779		0.556351	0.662346	2.85968
	47.2	40.89			89	207			0.126232	0.195467			0.687782	2.10587
		44.82				256

## Sheet: Figure 2
GOT				GPT				ALP				COL TOT				HDL				LDL				Trigli
N	D	D+T		N	D	D+T		N	D	D+T		N	D	D+T		N	D	D+T		N	D	D+T		N	D	D+T
71.21	194.4	156.2		36.68	103.9	155.8		165.7	230.2	215.5		149	217	213		104.3	152	149		42.5	63.1	61.7		153.1	255.3	189.9
99.93	95.89	213.8		34.87	99.69	84.68		150.5	202.6	226.9		122.7	220.5	191.9		86.7	154.7	134.3		34.6	63.2	54.2		103.8	219.2	182.86
92.14	349.1	387.4		21.97	202.1	153		177.3	329.4	265.9		72.99	277.4	199.2		51.1	193.9	139.1		19.2	81.1	57.4		60.62	196.9	188.8
124.1		274		66.56		207.7		165.5		365.6		105.2		159.8		73.5		112.6		29.3		76.4		155		175.1
95.16				32.36				123.5				89.69				62.9				25.1				155.7

## Sheet: Figue 3
Pancreatic Islets (#)			Pancreatic Islets (μm2)
N	D+T		N	D+T
9.5	0.7		4759.02	63.4
12	4		3401.81	686.81
11	4		1094.31	289.83
12			2252.4

## Sheet: Figure 4
Adipocyte Area (μm2)			Adipoyte Size (μm)			Adipoyte Size (μm)			Infiltated Area Total (mm2)
N	D+T		N	D+T		N	D+T		N	D+T
1151.28	1811.01		35.7763	40.664		35.7763	40.664		761.336	8839.24
733.569	1119.52		29.5159	34.6555		29.5159	34.6555		1735.59	16646.2
831.402	1184.23		31.2107	35.9222		31.2107	35.9222		2096.9	17684.9
857.469	1183.01		30.5776	33.9871		30.5776	33.9871		2129.16	17645.2
835.631	1322.63		30.6534	35.785		30.6534	35.785		1129.16	16680.9
940.898	1083.69		31.2766	32.62		31.2766	32.62

## Sheet: Figure 5
Collagen area (%)			#Fatty Deposits
N	D+T		N	D+T
0.0306386	1.41865		29.2	65.4
0.0101641	0.550305		34.9	61.1
0.010535	0.662914		19.5	71.2
0.012538	0.782952		29	40.5

## Sheet: Figure 6
FS (2D)			TEI Index			Pulmonary VTI			Mitral e-wave			Mitral a-wave			Aortic VTI
N	D+T		N	D+T		N	D+T		N	D+T		N	D+T		N	D+T
36.2745	29.2135		0.20457	0.210829		21.2	38.05		48.85	57.18		41.95	28.075		40.3667	39.8667
	25.9615		0.20457	0.384144			46.4			67.0775			29.62			36.925
26.3566	22.945		0.181306	0.292375		40.625	39.625		57.73	50.9567		22.8433	22.77		39.8333	42.16
27.6667	22.5225			0.466371		38.2667	35.8		49.5	33.39		38.2333	8.99		39.175	40.1
	18.3824			0.398			34.4			53.364			25.888			40.7
	22.2222			0.495361			34.5			57.0167			11.8067			38.35
	22.549						35.025			47.7775			16.195			35.76
P-wave duration			P-wave amplitude			R-wave amplitude			T-wave amplitude			PR interval			PR segment			QT interval			QTc Interval
N	D+T		N	D+T		N	D+T		N	D+T		N	D+T		N	D+T		N	D+T		0.379	0.182
0.037	0.023		0.05	0.02		0.44	0.24		0.08	0.01		0.047	0.04		0.01	0.017		0.21	0.093		0.31	0.216
0.037	0.017		0.03	0.02		0.32	0.29		0.04	0.03		0.053	0.037		0.017	0.02		0.147	0.107		0.276	0.247
0.025	0.02		0.02	0.02		0.31	0.23		0.04	0.02		0.037	0.043		0.013	0.023		0.143	0.123		0.22	0.221
0.02	0.02		0.02	0.03		0.29	0.26		0.04	0.02		0.037	0.047		0.017	0.027		0.083	0.133			0.262
	0.02			0.02			0.21			0.01			0.037			0.017			0.143			0.272
	0.023			0.03			0.29			0.02			0.04			0.017			0.133			0.268
	0.027			0.02			0.25			0.04			0.043			0.017			0.137

## Sheet: Figure 7
Collagen area (%)
N	D+T
0.1595	0.7836
0.1877	0.8641
0.1537	0.860334

## Sheet: Supplementary Figure
Diuresis				GFR				Urinary Albumina				CREA-U
N	D	D+T		N	D	D+T		N	D	D+T		N	D	D+T
3	1.6	1		0.2322	0.10994	0.0382767		5	6	23		27.76	31.91	21.26
1	1.7	0.7		0.229097	0.108349	0.0795508		10	10	10		33.73	28.91	40.38
2.5	1.7	1		0.10387	0.120442	0.0215185		7	10	12		25.01	23.72	34.86
2	1.5	0.3		0.337043	0.0691489	0.0284524		10	8	15		25.5	23.4	36
1.5	2	0.5		0.149704	0.105719	0.0384579		6	7	11		21.7	19.41	35
URINARY PROTEIN				URINARY UREA				mg/g of Urinary Creatinine				UREA-PLASMA
N	D	D+T		N	D	D+T		N	D	D+T		N	D	D+T
1421	899.3	3307		2905	2399	1270		18.01	19.35	108.18		47	45	80
2238	2967.6	3040		4320	2657	2454		30.3	43	52.18		53	44	60
2250	2047.8	4091		3803	1533	2147		27.98	43.5	50		68	35	50
3453	2067.2	3070		3073	1562	1487		39.21	34.8	46.49		61	73	54
3625	1523.6	3130		3333	1323	1550		27.64	36.84			79	40	35
PLASMA CREATININE
N	D	D+T
0.33	0.43	0.46
0.33	0.42	0.36
0.35	0.31	0.47
0.33	0.47	0.45
0.3	0.34	0.35
